# Supplementary material
Source: PubMed Central journal article supplement (PMC9281441)
Supplement: NIHMS1810677-supplement-1.pdf [file NIHMS1810677-supplement-1.pdf]

**Supplemental information**

**Sites of vulnerability in HCV E1E2 identified  
by comprehensive functional screening**

**Jennifer M. Pfaff-Kilgore, Edgar Davidson, Kathryn Kadash-Edmondson, Mayda Hernandez, Erin Rosenberg, Ross Chambers, Matteo Castelli, Nicola Clementi, Nicasio Mancini, Justin R. Bailey, James E. Crowe Jr., Mansun Law, and Benjamin J. Doranz**

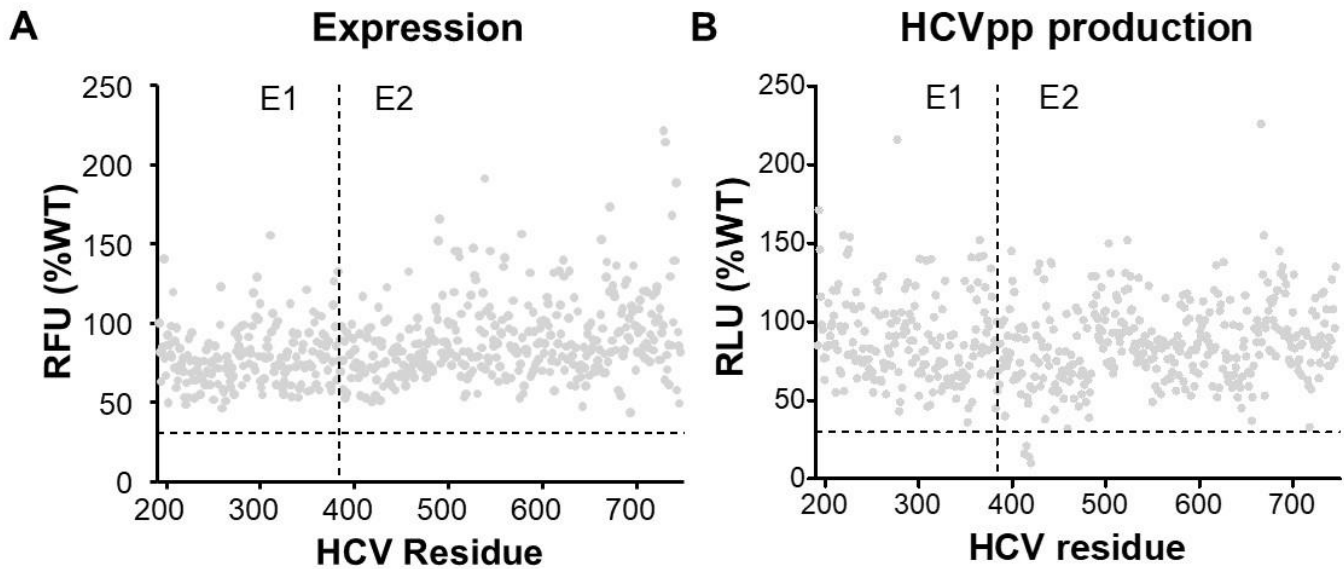

**Figure S1. Mutations do not affect full-length E1E2 expression or incorporation into HCVpp. Related to Figures 2 and 3.** Each clone of the HCV E1E2 library was transfected into HEK-293T cells. The C-terminus of E2 was constructed with a V5 tag. **(A)** Full-length E1E2 protein expression was analyzed by intracellular staining with an anti-V5 antibody. **(B)** E1E2 protein was incorporated onto pseudoviruses (HCVpp) by co-expression of E1E2 with HIV Gag-pol core and a luciferase reporter genome. Supernatants from each mutant clone were analyzed by ELISA. A mouse anti-CD81 antibody was used to capture pseudovirus particles, and linear human MAb HCV1 was used to detect E1E2 incorporation, values shown are the mean of two replicates. A chemiluminescence assay using an HRP-conjugated rabbit anti-human secondary antibody served as the readout for E1E2 incorporation. Clones with mutations in the known epitope of MAb HCV1 were omitted from the analysis.

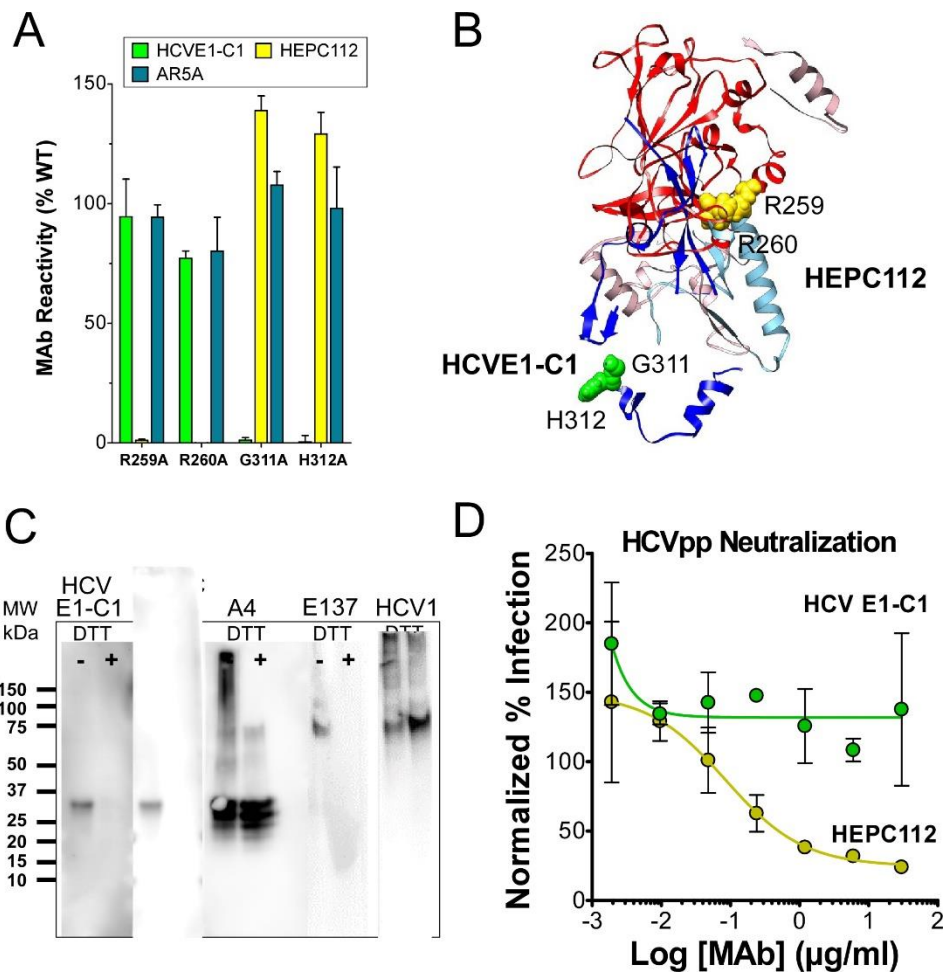

**Figure S2. Characterization of conformational anti-E1 MAbs. Related to Figure 1.** (A) Binding to critical mutations is shown for E1 MAbs HCVE1-C1 and HEPC112 (Colbert et al., 2019). MAb AR5A is shown as a control, as it binds only when E1 and E2 are in complex and is sensitive to mutations that perturb E1 structure (Giang et al., 2012). Binding values are given as a percentage of MAb binding to wild-type HCV E1E2 and are plotted with error bars showing half the range (highest minus lowest binding value) of at least two measurements. (B) The critical residues for HCVE1-C1 (G311 and H312) are shown as green spheres located in the transmembrane proximal region of E1 (PDB 2KNU). The critical epitope residues of HEPC112 (R259 and R260) are shown as yellow spheres, as reported previously (Colbert et al., 2019). (C) Conformational dependence of HCVE1-C1, HEPC112, and other MAbs was determined by Western analysis. Each well was loaded with 5 µg of protein from the lysate of HCV E1E2-expressing cells, followed by boiling in SDS-PAGE buffer without (-) or with DTT (+). MAbs HCVE1-C1, HEPC112 and A4 target E1, while MAbs E137 and HCV1 target E2. MAbs A4 and HCV1 recognize non-conformational epitopes, so were included as controls. (D) Neutralization by anti-E1 MAbs HCVE1-C1 and HEPC112 were assayed by incubation with wild-type HCVpp prior to infection of HEK-293T cells expressing Claudin 1. Infectivity values were normalized to the value for infectivity obtained without antibody. Values represent the mean of 2 replicates, with error bar showing the range.

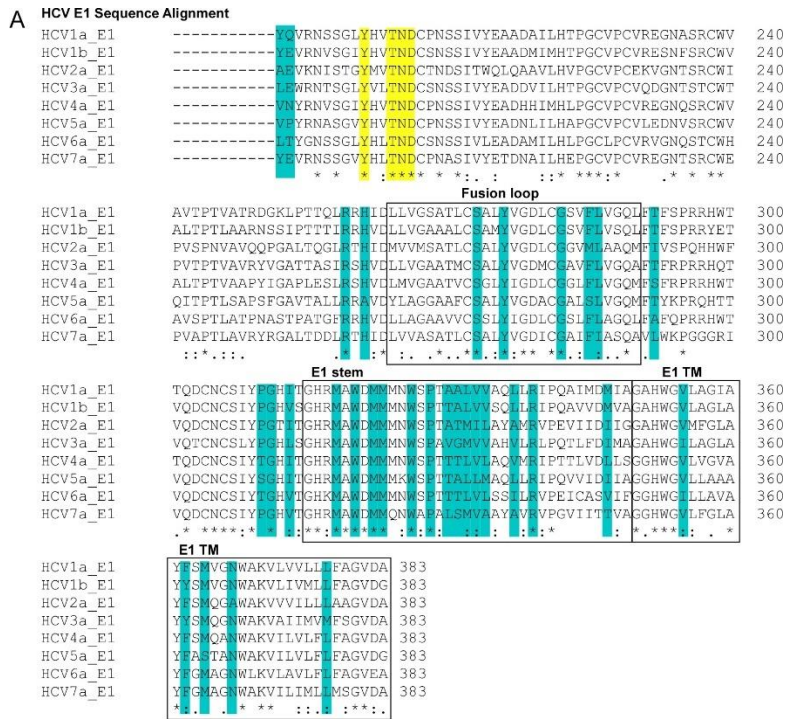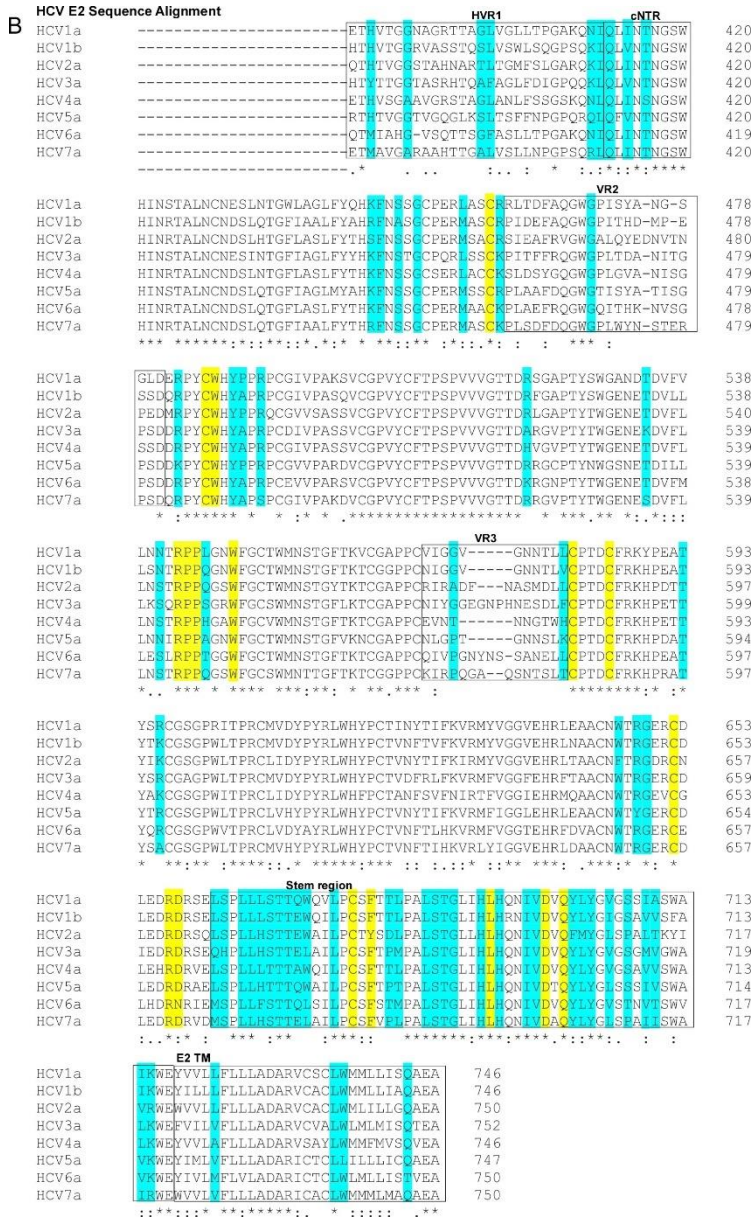

**Figure S3. Sequence conservation of HCV Env polyprotein across HCV genotypes. Related to Figure 3.** (A) Sequence alignment for HCV E1 glycoprotein. (B) Sequence alignment for HCV E2 glycoprotein. Critical residues for E1E2 assembly are highlighted in yellow, those for infectivity in blue. ClustalW alignment was performed using parental sequence HCV1a isolate H77 together with reference sequences for each genotype recommended by the International Committee on Taxonomy of Viruses. Regions of structure- and sequence-related importance are denoted. Subtype/genotype, isolate/locus, accession # (reference): 1b, HPCJCG, D90208 (Kato et al., 1990); 2a, HPCPOLP, D00944 (Han and Houghton, 1992; Hotta et al., 1994; Okamoto et al., 1991); 3a, HPCEGS, D17763 (Sakamoto et al., 1994); 4a, ED43, Y11604 (Chamberlain et al., 1997a); 5a, EUH1480, Y13184 (Chamberlain et al., 1997b); 6a, EUHK2, Y12083 (Adams et al., 1997); 7a, QC69, EF108306 (Murphy et al., 2015).

**Table S1. Antibodies used in this study. Related to Figures 2, 3**

| MAb (Ref.)                                                  | Epitope |            |                                                                                  | Neutralization Ability |                           |                              |                                                 |          |                                                           |       |
|-------------------------------------------------------------|---------|------------|----------------------------------------------------------------------------------|------------------------|---------------------------|------------------------------|-------------------------------------------------|----------|-----------------------------------------------------------|-------|
|                                                             | Type    | Region     | Critical Residues                                                                | Test                   | Tested Genotypes          | Cross-reactivity             | Fraction of 1a Strains Neutralized <sup>a</sup> | Potency  | Mechanism                                                 | Class |
|                                                             |         |            |                                                                                  |                        |                           |                              |                                                 |          |                                                           |       |
| <b>Broadly Neutralizing MABs</b>                            |         |            |                                                                                  |                        |                           |                              |                                                 |          |                                                           |       |
| AP33<br>(Owsianka et al., 2005)                             | NC      | E2<br>cNTR | L413, N415,<br>G418, W420                                                        | HCVpp                  | 1a, 1b,<br>2a, 2b,<br>3-6 | All<br>tested                | N/D                                             | High     | CD81<br>interaction                                       | bNAb  |
| AR2A<br>(Giang et al., 2012;<br>Law et al., 2008)           | C       | E2<br>AR2  | K628                                                                             | HCVpp,<br>HCVcc        | 1a, 1b,<br>2a, 2b,<br>3-6 | 1a, 2a,<br>2b, 4-5           | N/D                                             | Variable | Post-<br>attachment                                       | bNAb  |
| AR3A<br>(Giang et al., 2012;<br>Law et al., 2008)           | C       | E2<br>AR3  | T425, N428, G436,<br>W437, L438, F442,<br>Y485, W529, G530,<br>D535, W616        | HCVpp,<br>HCVcc        | 1a, 1b,<br>2a, 2b,<br>3-6 | All<br>tested                | N/D                                             | Variable | CD81<br>binding,<br>pre-/post-<br>attachment              | bNAb  |
| AR3B<br>(Law et al., 2008)                                  | C       | E2<br>AR3  | T425, L427, N428,<br>W437, G440, F442,<br>D520, W529, G530,<br>D535, W616        | HCVpp,<br>HCVcc        | 1a, 1b,<br>2a, 2b,<br>4-5 | All<br>tested                | N/D                                             | Variable | CD81<br>binding                                           | bNAb  |
| AR3C<br>(Law et al., 2008)                                  | C       | E2<br>AR3  | T425, N428, W437,<br>L438, F442, Y443,<br>W529, G530, D535,<br>W616              | HCVpp,<br>HCVcc        | 1a, 1b,<br>2a, 2b,<br>4-5 | All<br>tested                | N/D                                             | Variable | CD81<br>binding                                           | bNAb  |
| AR3D<br>(Law et al., 2008)                                  | C       | E2<br>AR3  | T425, L427, N428,<br>G436, W437, G440,<br>F442, D520, W529,<br>G530, D535, W616  | HCVpp,<br>HCVcc        | 1a, 1b,<br>2a, 2b,<br>4-5 | All<br>tested                | N/D                                             | Variable | CD81<br>binding                                           | bNAb  |
| AR4A<br>(Torrents de la Peña et<br>al., 2021)               | C       | E2<br>stem | I696                                                                             | HCVpp,<br>HCVcc        | 1a, 1b,<br>2a, 2b,<br>3-6 | 1a, 2a,<br>4a, 5a,<br>6a     | N/D                                             | Variable | Pre-/post-<br>attachment                                  | bNAb  |
| AR5A<br>(Giang et al., 2012)                                | C       | E2<br>stem | K628, R630,<br>L665                                                              | HCVpp,<br>HCVcc        | 1a, 1b,<br>2a, 2b,<br>3-6 | 1a, 1b,<br>2a, 4-6           | N/D                                             | Variable | Pre-/post-<br>attachment                                  | bNAb  |
| e20<br>(Castelli et al., 2017;<br>Mancini et al., 2009)     | C       | E2<br>AR3  | T425, L427, N428,<br>W437, F442, W529,<br>G530, W616                             | HCVpp,<br>HCVcc        | 1a, 1b, 2a,<br>2b, 4-5    | 1a, 1b, 2a,<br>2b, 4         | N/D                                             | Variable | CD81<br>binding                                           | bNAb  |
| e137<br>(Castelli et al.,<br>2017; Perotti et<br>al., 2008) | C       | E2<br>AR3  | T425, N428,<br>N430, S432,<br>W437, L438,<br>G530                                | HCVpp,<br>HCVcc        | 1a, 1b,<br>2a, 2b,<br>3-6 | 1a, 1b,<br>2b, 4             | N/D                                             | Variable | CD81<br>binding                                           | bNAb  |
| H77.39<br>(Sabo et al., 2011)                               | NC      | E2<br>cNTR | N415, G418,<br>W420                                                              | FFU<br>assay           | 1-6                       | 1-5                          | N/D                                             | High     | CD81 and<br>SR-B1<br>binding early<br>post-<br>attachment | bNAb  |
| HCV1<br>(Broering et al., 2009;<br>Kong et al., 2012)       | NC      | E2<br>cNTR | L413, G418,<br>W420                                                              | HCVpp                  | 1a, 1b, 2b,<br>3a, 4a     | All<br>tested                | N/D                                             | High     | CD81<br>binding                                           | bNAb  |
| HEPC3<br>(Bailey et al., 2017)                              | C       | E2<br>AR3  | T425, L427,<br>N428, W437,<br>A499, D520,<br>G530                                | HCVcc                  | 1a, 1b,<br>2-6            | 1a, 1b, 2a,<br>4a, 5a, 6a    | 16/19                                           | High     | CD81<br>binding                                           | bNAb  |
| HEPC13<br>(Bailey et al., 2017)                             | C       | E2<br>AR3  | T425, L427,<br>N428, W437,<br>A499, D520,<br>G530                                | HCVcc                  | 1a, 1b,<br>2-6            | 1a, 1b,<br>2a, 4a,<br>5a, 6a | 16/19                                           | High     | CD81<br>binding                                           | bNAb  |
| HEPC74<br>(Bailey et al., 2017;<br>Mankowski et al., 2018)  | C       | E2<br>AR3  | N428, G530,<br>D535                                                              | HCVcc                  | 1a, 1b,<br>2-6            | 1a, 1b, 2a,<br>4a, 5a, 6a    | 17/19                                           | Variable | CD81<br>binding                                           | bNAb  |
| HEPC43<br>(Bailey et al., 2017)                             | C       | E2<br>AR3  | T425, L427, N428,<br>G436, W437, L438,<br>G440, F442, Y443,<br>A499, G517, T519, | HCVcc                  | 1a, 1b,<br>2-6            | 1a, 1b,<br>2a, 4a, 5a,<br>6a | 17/19                                           | Variable | CD81<br>binding                                           | bNAb  |

|                                                                          |    |         |                                                                             |             |             |                        |       |                      |                                     |      |
|--------------------------------------------------------------------------|----|---------|-----------------------------------------------------------------------------|-------------|-------------|------------------------|-------|----------------------|-------------------------------------|------|
|                                                                          |    |         | D520, Y527, W529, G530, D535, W616                                          |             |             |                        |       |                      |                                     |      |
| IGH505 <sup>c</sup><br>(Meunier et al., 2008; Wahid and Dubuisson, 2013) | NC | E1 stem | H316, W320, M323                                                            | HCVpp       | 1a, 1b, 2-6 | 1a, 1b, 2a, 4a, 5a, 6a | N/D   | High (excl. weak 2a) | Post-binding                        | bNAb |
| IGH526<br>(Meunier et al., 2008; Wahid and Dubuisson, 2013)              | NC | E1 stem | H316, A319, W320, M323, M324                                                | HCVpp       | 1a, 1b, 2-6 | 1a, 1b, 2a, 4a, 5a, 6a | N/D   | Variable             | Post-binding                        | bNAb |
| <b>Neutralizing MAbs</b>                                                 |    |         |                                                                             |             |             |                        |       |                      |                                     |      |
| e301<br>(Burioni et al., 2002; Castelli et al., 2017)                    | C  | E2 AR3  | T425, L427, N428, W437, L438, G440, F442, D520, W529, G530, D535, W616      | VSV/HCV     | 1a, 1b      | 1a, 1b                 | N/D   | Moderate             | CD81 binding                        | NAb  |
| e509<br>(Castelli et al., 2017; Sautto et al., 2012)                     | C  | E2 AR3  | T425, L427, N428, G436-L438, G440, F442, W529, G530, D535, Y594, W616, C620 | HCVpp       | 1a, 1b, 2a  | 1a                     | N/D   | High                 | CD81 binding                        | NAb  |
| H77.16<br>(Keck et al., 2016; Sabo et al., 2011)                         | NC | E2 HVR1 | P405-K408, N410-I411                                                        | FFU assay   | 1a, 2a      | 1a                     | N/D   | High                 | SR-B1 binding early post-attachment | NAb  |
| H77.28<br>(Sabo et al., 2011)                                            | NC | E2 AR1  | D535, T542-P544                                                             | FFU assay   | 1a, 2a      | 1a                     | N/D   | Weak                 | Pre-attachment                      | NAb  |
| HEPC98<br>(Bailey et al., 2017; Mankowski et al., 2018)                  | NC | E2 HVR1 | L402, P405, K408                                                            | HCVpp panel | 1a, 1b      | 1a, 1b                 | 6/19  | Variable             | Pre-attachment                      | NAb  |
| HEPC108<br>(Colbert et al., 2019)                                        | C  | E2 AR1  | R543, P545, N548, Y594, G635                                                | HCVpp panel | 1a, 1b      | 1a, 1b                 | 15/19 | Variable             | Unknown                             | NAb  |
| HEPC111<br>(Colbert et al., 2019)                                        | C  | E2 stem | W672, L666                                                                  | HCVpp panel | 1a, 1b      | 1a, 1b                 | 14/19 | Variable             | Pre-/post-attachment                | NAb  |
| HEPC112<br>(Colbert et al., 2019)                                        | C  | E1      | R259, R260                                                                  | HCVpp panel | 1a, 1b      | 1a                     | 7/19  | Variable             | Unknown                             | NAb  |
| HEPC122<br>(Colbert et al., 2019)                                        | C  | E2 AR3  | I422, L441, H445, Y527, W529, W616, C620                                    | HCVpp panel | 1a, 1b      | 1a, 1b                 | 13/19 | High/variable        | CD81 binding                        | NAb  |
| HEPC146<br>(Colbert et al., 2019)                                        | C  | E2 AR3  | G517, T534, W529                                                            | HCVpp panel | 1a, 1b      | 1a, 1b                 | 16/19 | High/variable        | Pre-/post-attachment                | NAb  |
| HEPC 151-1<br>(Colbert et al., 2019)                                     | C  | E2 AR3  | W529                                                                        | HCVpp panel | 1a, 1b      | 1a, 1b                 | 16/19 | High                 | CD81 binding                        | NAb  |
| HEPC 151-2<br>(Colbert et al., 2019)                                     | C  | E2 AR1  | R543-P545, N548, Y594, G635                                                 | HCVpp panel | 1a, 1b      | 1a                     | 9/19  | Variable             | Unknown                             | NAb  |
| HEPC153<br>(Colbert et al., 2019)                                        | C  | E2 AR3  | N423, L427, N430, S432, W437, L441, F442, R455, G517, Y527, W529, W616      | HCVpp panel | 1a, 1b      | 1a, 1b                 | 17/19 | High                 | CD81 binding                        | NAb  |
| HEPC154<br>(Colbert et al., 2019)                                        | C  | E2 AR3  | N430, S432, W437, F442                                                      | HCVpp panel | 1a, 1b      | 1a, 1b                 | 14/19 | High/variable        | CD81 binding                        | NAb  |
| HEPC158<br>(Colbert et al., 2019)                                        | C  | E2 AR1  | R543, P544, P545, N548, Y594, G635                                          | HCVpp panel | 1a, 1b      | 1a                     | 9/19  | Variable             | Unknown                             | NAb  |

| Non-neutralizing MAbs                                         |   |                 |                                                                                 |                 |                            |     |      |     |     |             |
|---------------------------------------------------------------|---|-----------------|---------------------------------------------------------------------------------|-----------------|----------------------------|-----|------|-----|-----|-------------|
| AR1A<br>(Law et al., 2008)                                    | C | E2<br>AR1       | T519, T542,<br>P544, P545,<br>G547, N548,<br>Y632                               | HCVpp,<br>HCVcc | 1a, 1b,<br>2a, 2b,<br>4, 5 | N/D | N/D  | N/A | N/A | Non-<br>NAb |
| AR1B<br>(Ball et al., 2014;<br>Law et al., 2008)              | C | E2<br>AR1       | P544, P545,<br>G547, N548                                                       | HCVpp,<br>HCVcc | 1a, 1b, 2a,<br>2b, 4, 5    | N/D | N/D  | N/A | N/A | Non-<br>NAb |
| e8<br>(Castelli et al., 2014)                                 | C | E2<br>AR1       | T542, P544,<br>P545, G547,<br>N548, V633                                        | VSV/<br>HCV     | 1b                         | N/D | N/D  | N/A | N/A | Non-<br>NAb |
| e10<br>(Bugli et al., 2001;<br>Castelli et al., 2014)         | C | E2<br>AR3       | T425, P498,<br>A499, T519,<br>D520, R521,<br>G530                               | Unknown         | 1a                         | N/D | N/D  | N/A | N/A | Non-<br>NAb |
| H60<br>(Castelli et al., 2014)                                | C | E2 AR1,<br>HVR2 | G470, I472,<br>Y474, R543,<br>P544, P545,<br>Y594                               | Unknown         | 1a                         | N/D | N/D  | N/A | N/A | Non-<br>NAb |
| H77.47<br>(Sabo et al., 2011)                                 | C | E2<br>AR1       | R543-L546                                                                       | FFU<br>assay    | 1a, 2a                     | N/D | N/D  | N/A | N/A | Non-<br>NAb |
| HEPC50<br>(Bailey et al., 2017)                               | C | E2<br>AR1       | R543, P544,<br>P545, G547,<br>Y594, C597,<br>G598, Y632                         | HCVpp<br>panel  | 1a, 1b                     | N/D | 0/19 | N/A | N/A | Non-<br>NAb |
| HEPC46<br>(Bailey et al., 2017;<br>Mankowski et al.,<br>2018) | C | E2<br>AR1       | N541, T542, R543,<br>P544, P545, L546,<br>G547, N548, Y594,<br>C597, G598, V633 | HCVpp<br>panel  | 1a, 1b                     | N/D | 0/19 | N/A | N/A | Non-<br>NAb |
| S1<br>(Giang et al., 2012)                                    |   | E2<br>stem      | S512, Y632                                                                      | N/D             | N/A                        | N/A | N/A  | N/A | N/A | E2<br>stem  |
| AB<br>(Giang et al., 2012)                                    | C | E2<br>stem      | R630, E641                                                                      | N/D             | N/A                        | N/A | N/A  | N/A | N/A | E2<br>stem  |
| HCVE1-C1<br>(this manuscript)                                 | C | E1<br>stem      | G311, H312                                                                      | HCVpp           | 1a                         | N/D | N/D  | N/A | N/A | Non-<br>NAb |

<sup>a</sup>For 1a/1b panel tests, “fraction of 1a strains neutralized” refers to the number of strains of genotype 1a HCVpp that were neutralized by the MAb compared to all tested strains. In the original characterization of MAbs from (Colbert et al., 2019) the same data used here to identify critical binding residues were analyzed more broadly to recognize binding residues and also residues that might be important for the local structure of the MAb binding site. Abbreviations: AR1-5, antigenic regions 1-5; cNTR, conserved N-terminal region; C, conformational; NC, non-conformational; NTR, N-terminal region; N/D, not determined; N/A, not applicable.



**Table S2. Critical residues for E1E2 structure and function. Related to Figures 2, 3.**

| Stage               | Protein | Region <sup>a</sup> | Critical Residues                                                                                                                                                                                                                                   |
|---------------------|---------|---------------------|-----------------------------------------------------------------------------------------------------------------------------------------------------------------------------------------------------------------------------------------------------|
| Folding             | E1      | Unknown             | D218, I220, H222, G225, <i>C226</i> , V227, P228, <i>C229</i> , V230, R231, E232, G233, <i>C238</i> , W239, V242, V246, T248, D250, G251, L253, P254, L258, D263, R297, H298, T300, Q302, <i>C304</i> , N305*, <i>C306</i> , H352, G354, F378, D382 |
| Folding             | E1      | N-terminus          | <i>C207</i> , N209*, I212, E215                                                                                                                                                                                                                     |
| Folding             | E1      | Putative IFL        | D279                                                                                                                                                                                                                                                |
| Folding             | E2      | Front layer         | T425*, N428, <i>C429</i>                                                                                                                                                                                                                            |
| Folding             | E2      | β-sandwich          | <i>C494</i> , I496, V497, A499, V502, <i>C503</i> , G504, P505, V506, Y507, <i>C508</i> , F509, P511, V514, V516, T518, F537, N540*, F550, G551, <i>C552</i> , W554, M555, N556*, G559, T561, <i>C564</i> , G565, <i>C569</i>                       |
| Folding             | E2      | CD81BL              | D520, G523, G530, D535                                                                                                                                                                                                                              |
| Folding             | E2      | Back layer          | G600, W602, I603, <i>C607</i> , M608, V609, D610, Y611, R614, H617, Y618, P619, T621, N623*, T625*, H638, L640, A642, A643, <i>C644</i>                                                                                                             |
| E1E2 dimer assembly | E1      | N-terminus          | Y201, T204, N205, D206                                                                                                                                                                                                                              |
| E1E2 dimer assembly | E2      | Unknown             | <i>C581</i> , <i>C585</i>                                                                                                                                                                                                                           |
| E1E2 dimer assembly | E2      | Back layer          | <i>C459</i> , <i>C486</i>                                                                                                                                                                                                                           |
| E1E2 dimer assembly | E2      | β-sandwich          | W487, R543, P544, P545, W549                                                                                                                                                                                                                        |
| E1E2 dimer assembly | E2      | Stem                | <i>C652</i> , R657, D658, <i>C677</i> , F679, L692, D698, Q700                                                                                                                                                                                      |
| CD81 LEL binding    | E2      | cNTR                | W420                                                                                                                                                                                                                                                |
| CD81 LEL binding    | E2      | Front layer         | I422, S424, L427, N430*, S432*, G436, W437, L438, G440, L441, F442, Y443                                                                                                                                                                            |
| CD81 LEL binding    | E2      | β-sandwich          | V515                                                                                                                                                                                                                                                |
| CD81 LEL binding    | E2      | CD81BL              | T519, T526, Y527, W529                                                                                                                                                                                                                              |
| CD81 LEL binding    | E2      | Back layer          | W616                                                                                                                                                                                                                                                |
| Infectivity         | E1      | E1 cleavage         | Y192, Q193                                                                                                                                                                                                                                          |
| Infectivity         | E1      | Unknown             | R259, H261, T292, P310, G311, I313                                                                                                                                                                                                                  |
| Infectivity         | E1      | Putative IFL        | S273, Y276, G282, F285, L286                                                                                                                                                                                                                        |
| Infectivity         | E1      | Stem                | M318, W320, M322, M323, W326, P328, A330, A331, L332, V333, V334, L337, R339, M347                                                                                                                                                                  |
| Infectivity         | E1      | TM                  | V355, F362, M364, N367, L377                                                                                                                                                                                                                        |
| Infectivity         | E2      | HVR1, SR-B1         | H386, G390, G398, L399, N410, I411                                                                                                                                                                                                                  |
| Infectivity         | E2      | cNTR                | Q412, I414, T416                                                                                                                                                                                                                                    |
| Infectivity         | E2      | Front layer         | K446, F447, S449, G451, L456                                                                                                                                                                                                                        |
| Infectivity         | E2      | VR2                 | R460, G470, R483                                                                                                                                                                                                                                    |
| Infectivity         | E2      | Back layer          | Y489, P490, T593, R596, W646, R648, G649                                                                                                                                                                                                            |
| Infectivity         | E2      | β-sandwich          | R492, N541, L546                                                                                                                                                                                                                                    |
| Infectivity         | E2      | CD81BL              | R521, T534*                                                                                                                                                                                                                                         |
| Infectivity         | E2      | igVR                | G572, L579                                                                                                                                                                                                                                          |
| Infectivity         | E2      | Stem                | L662, S663, L665, L666, L667, S668, T669, T670, Q671, W672, L675, T681, L682, L685, S686, T687, G688, H691, H693, I696, V697, Y701, L702, Y703, V705, S707, I709, A710, I714, K715                                                                  |
| Infectivity         | E2      | TM                  | L722, L735, W736, Q743                                                                                                                                                                                                                              |

Critical cysteines are italicized; \* residues in glycosylation sequences are denoted by asterisks. Abbreviations: CD81BL, CD81 binding loop; cNTR, conserved N-terminal domain; HVR1, hypervariable region 1; igVR, intergenotypic variable region; IFL, internal fusion loop; LEL, long extracellular loop; SR-B1, scavenger receptor B type 1 binding site; TM, transmembrane domain.

<sup>a</sup>Regions of the HCV Env sequence or structure were identified from the literature and reflect the current consensus based on all available experimental evidence (Akbar and Jusoh, 2013; Drummer et al., 2006; Drummer et al., 2007; Flint et al., 1999; Lavillette et al., 2007; Tong et al., 2017).
